# Supplementary material for: Calendula arvensis (Vaill.) L.: A Systematic Plant Analysis of the Polar Extracts from Its Organs by UHPLC-HRMS
Source: MDPI journal article supplement (doi:10.3390/foods11030247), 2022-01-18

Supplementary Materials

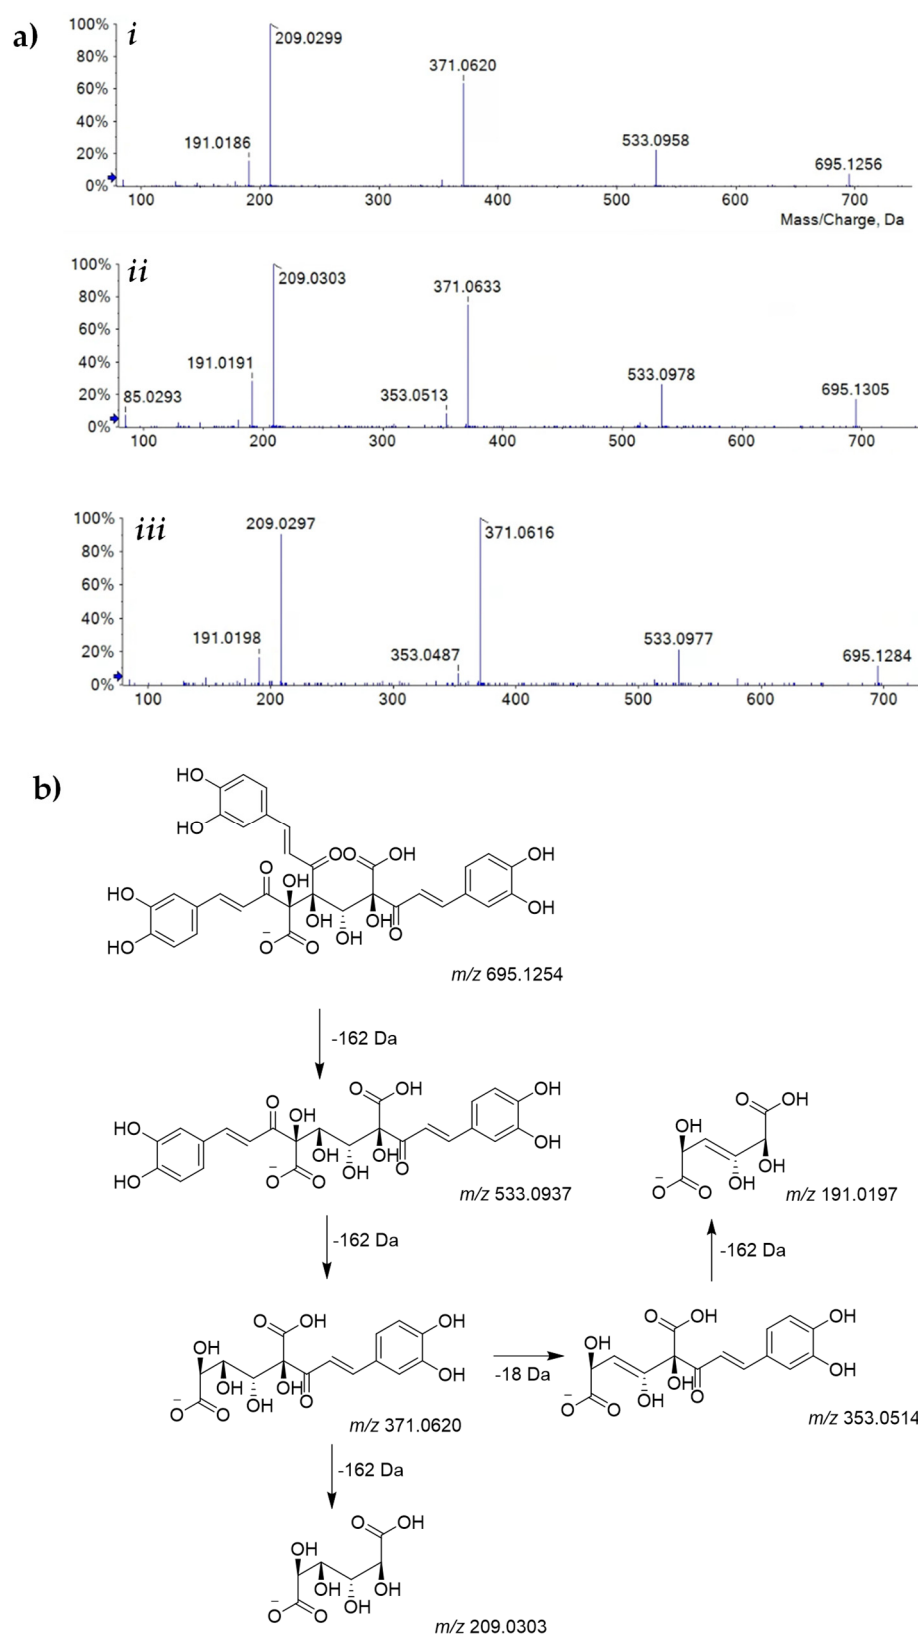

**Figure S1.** (a) TOF-MS/MS spectrum of the compounds (i) 30, (ii) 31, and (iii) 33; and (b) tentative fragmentation pathway of the theoretical  $[M-H]^-$  ion at  $m/z$  695.1254.

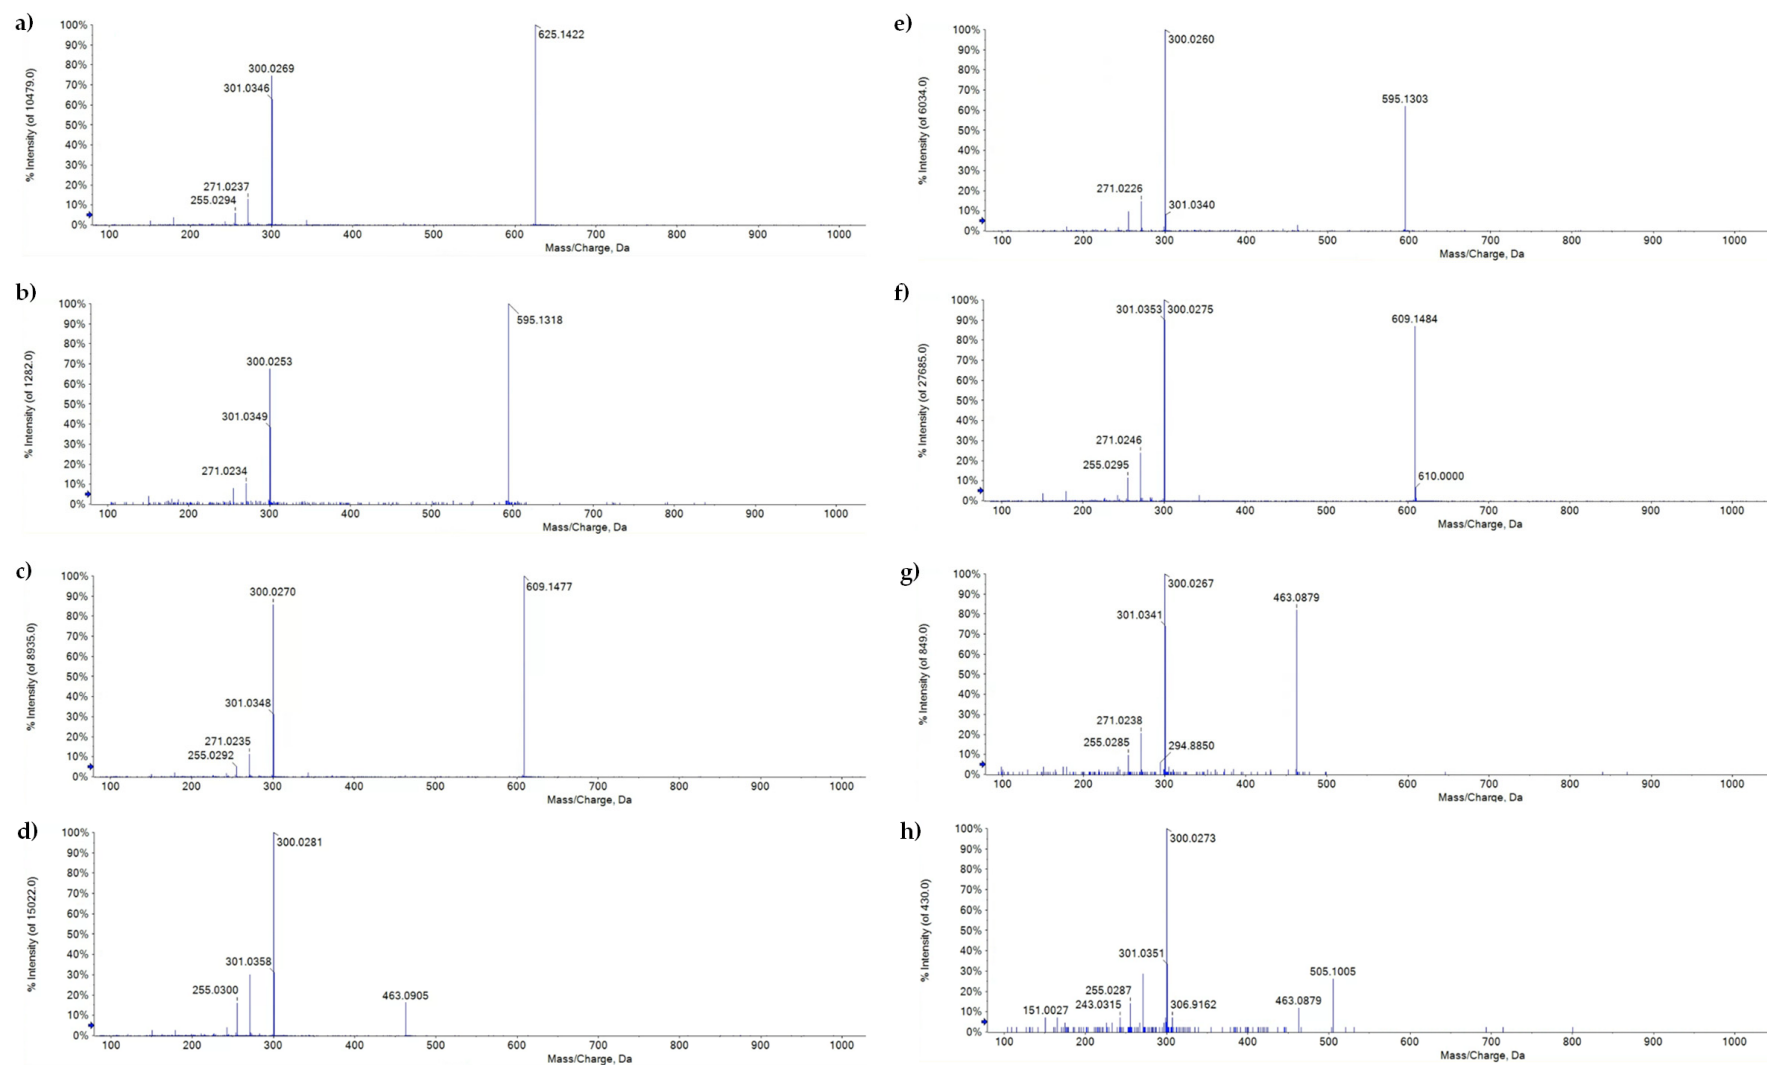

**Figure S2.** TOF-MS/MS spectrum of the quercetin glycosides from the floret alcoholic extract (a) **10**, (b) **11**, (c) **12**, (d) **13**, (e) **14**, (f) **15**, (g) **16** and (h) **22**. Neutral losses of 324.10 (**10** and **12**), 294.09 (**11** and **14**), 308.11 (**12** and **15**), 162.05 (**13** and **16**), and 204.06 (**22**) allowed the glyconic moiety to be recognized.

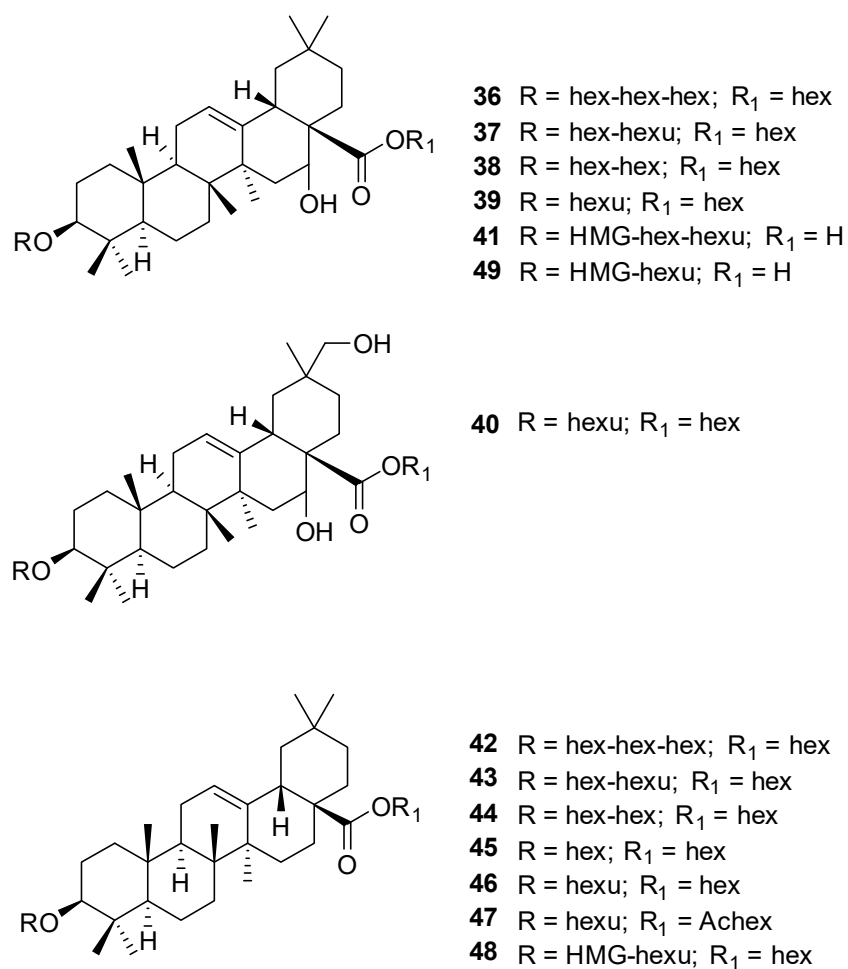

**Figure S3.** Chemical structures of triterpene saponins (36–49) tentatively identified in the *C. arvensis* alcoholic extracts. Hex = hexose; Hexu = hexuronic acid; Achex = acetylhexose; HMG = Hydroxymethylglutaric acid.

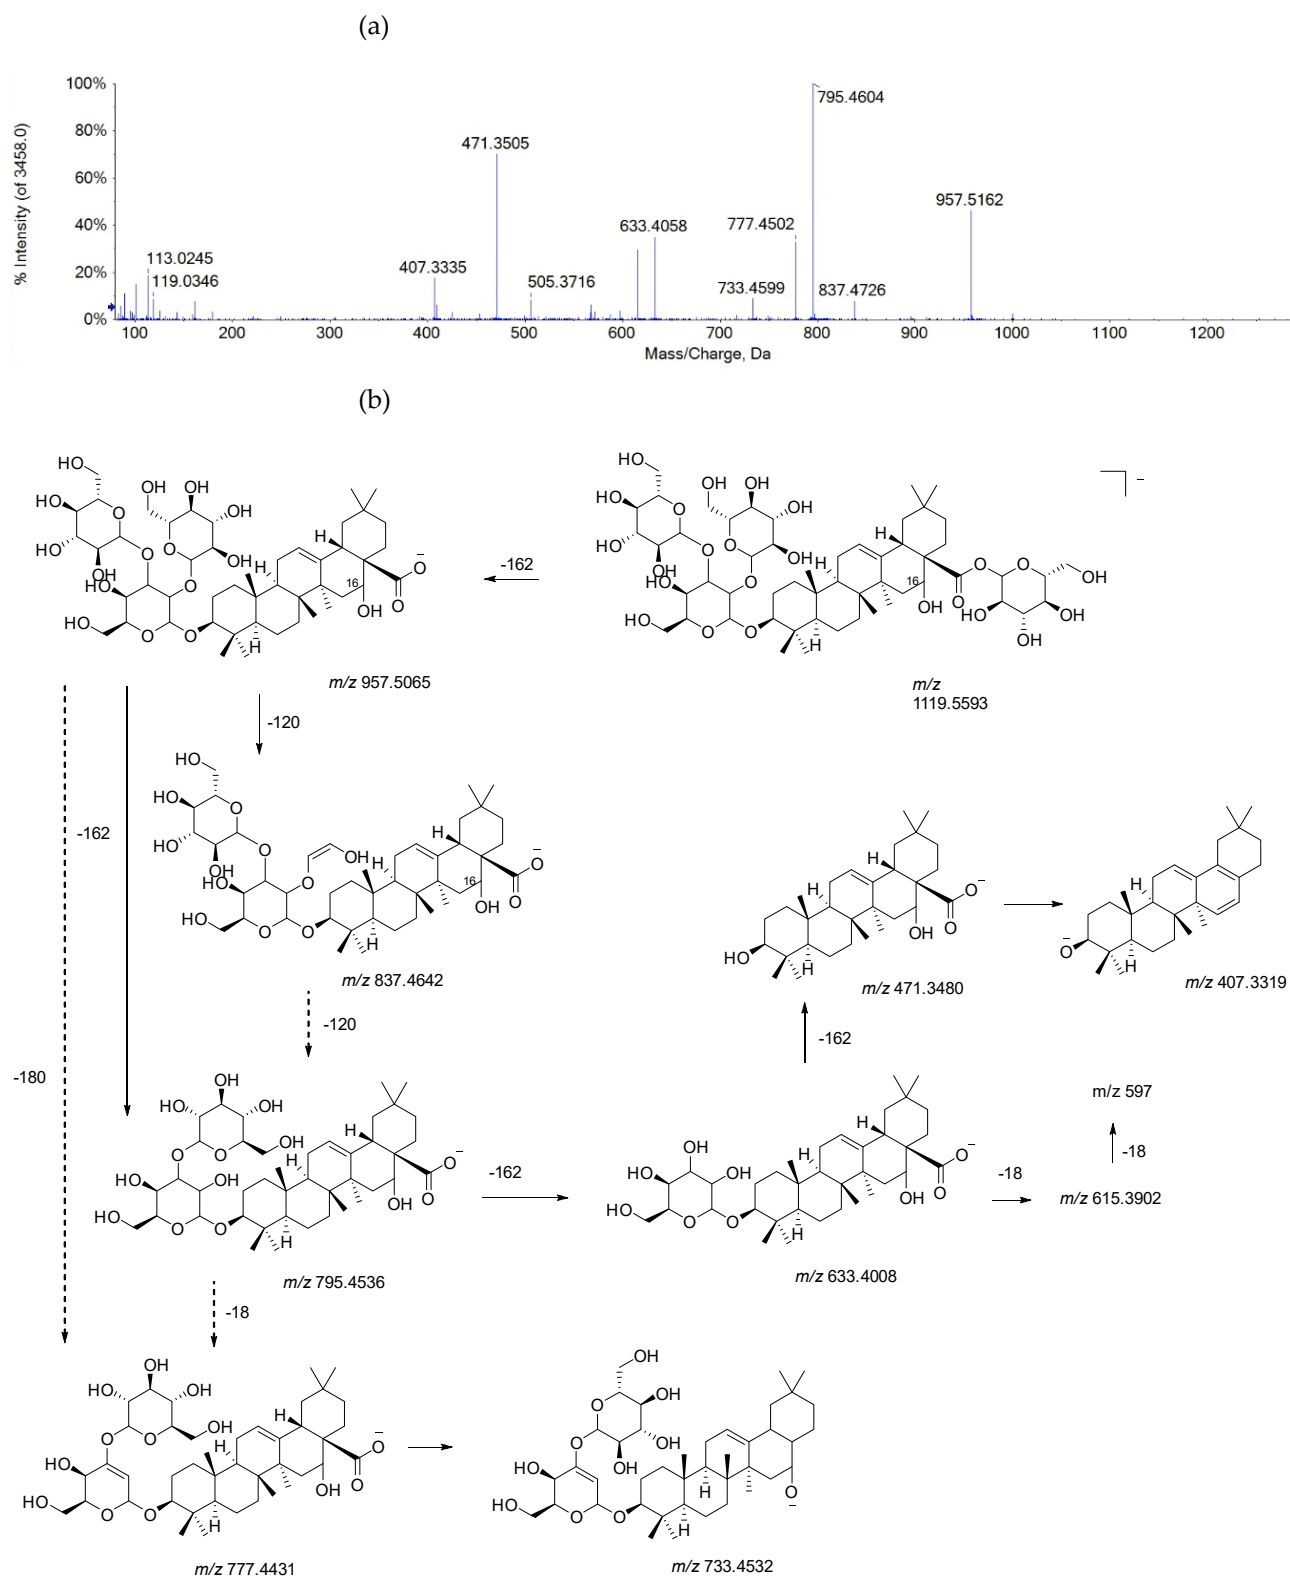

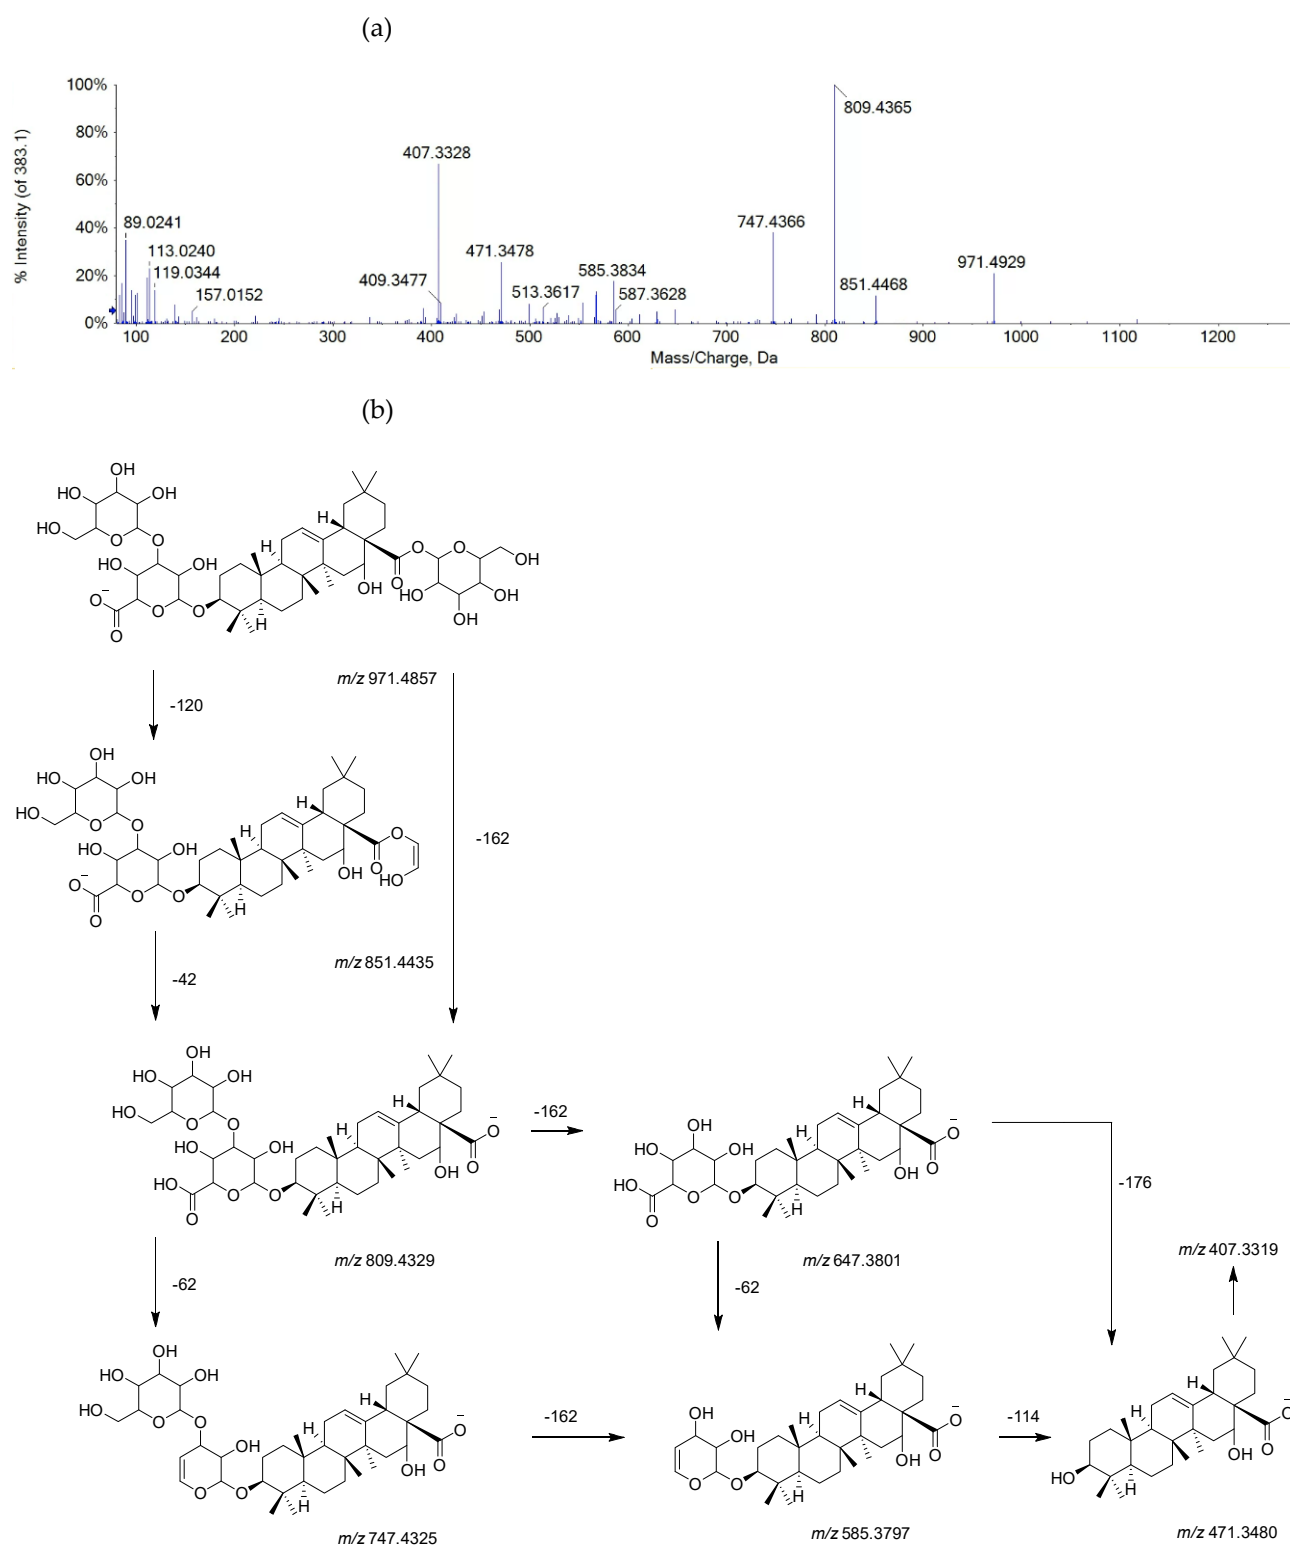

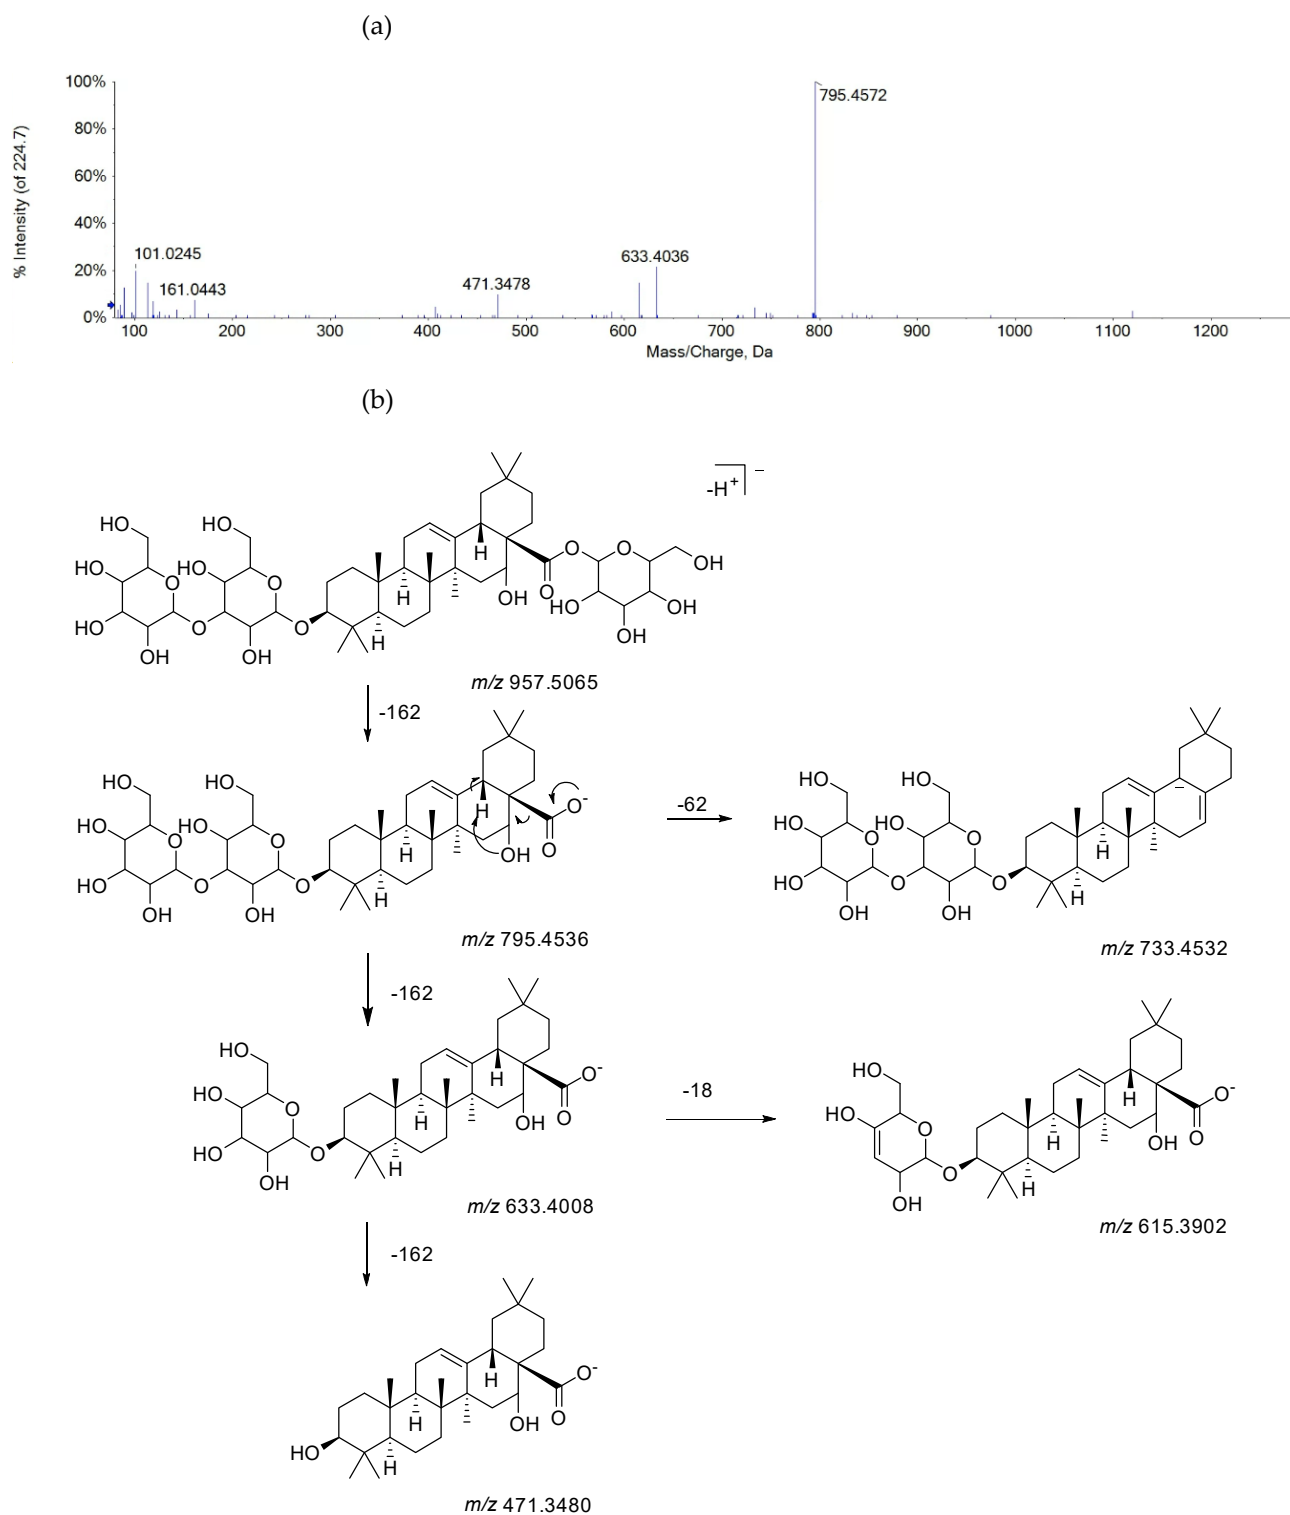

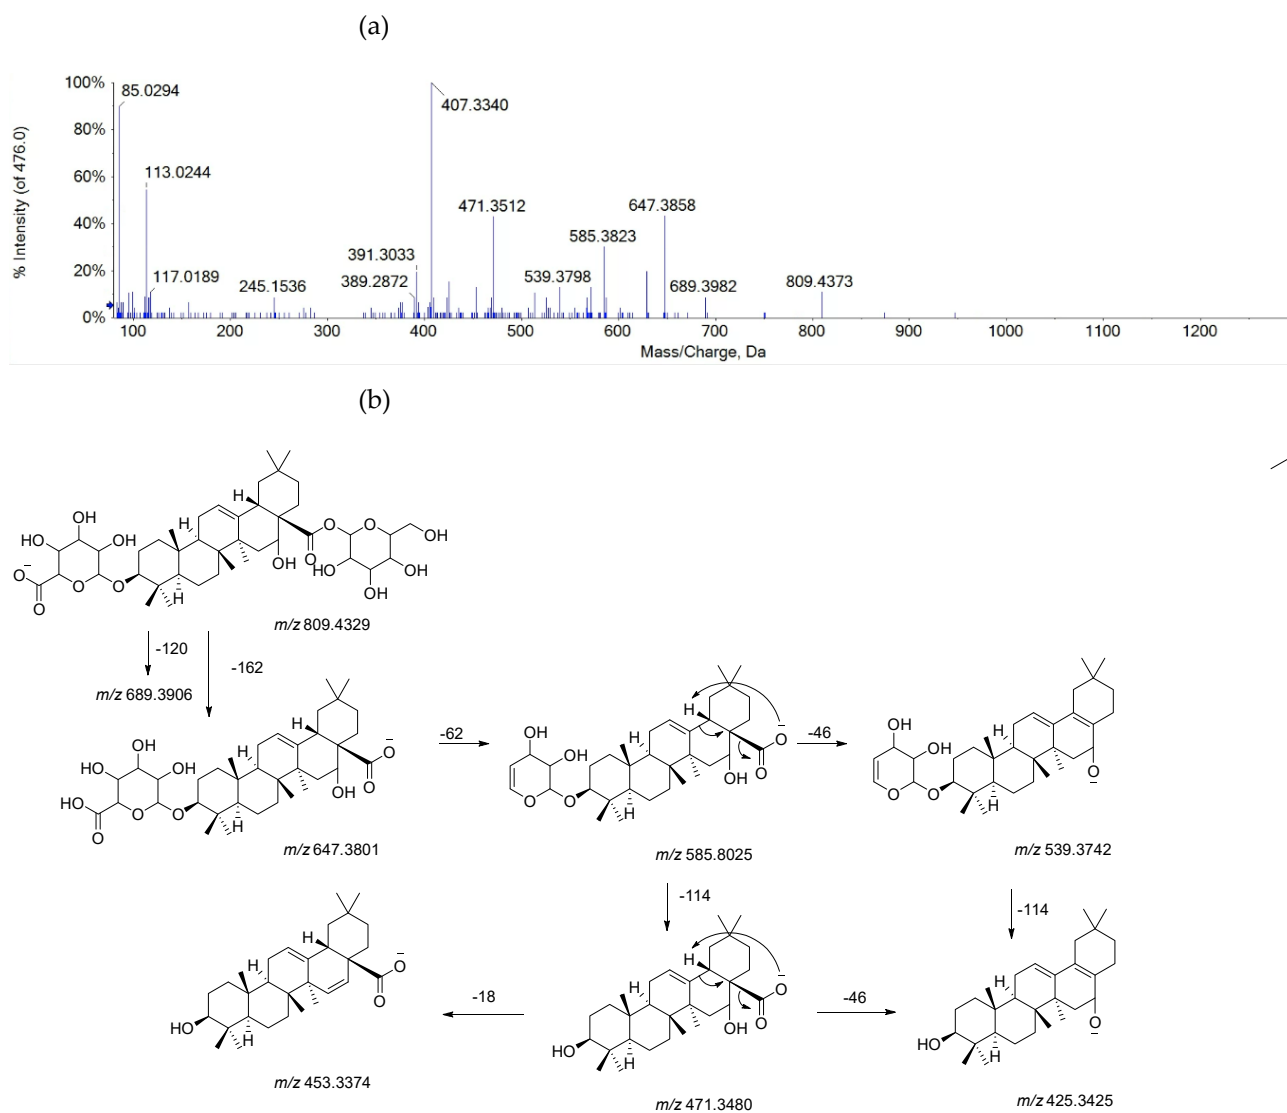

**Figure S7.** (a) TOF-MS/MS spectrum, and (b) tentative fragmentation pathway of the theoretical  $[M-H]^-$  ion for compound 39.

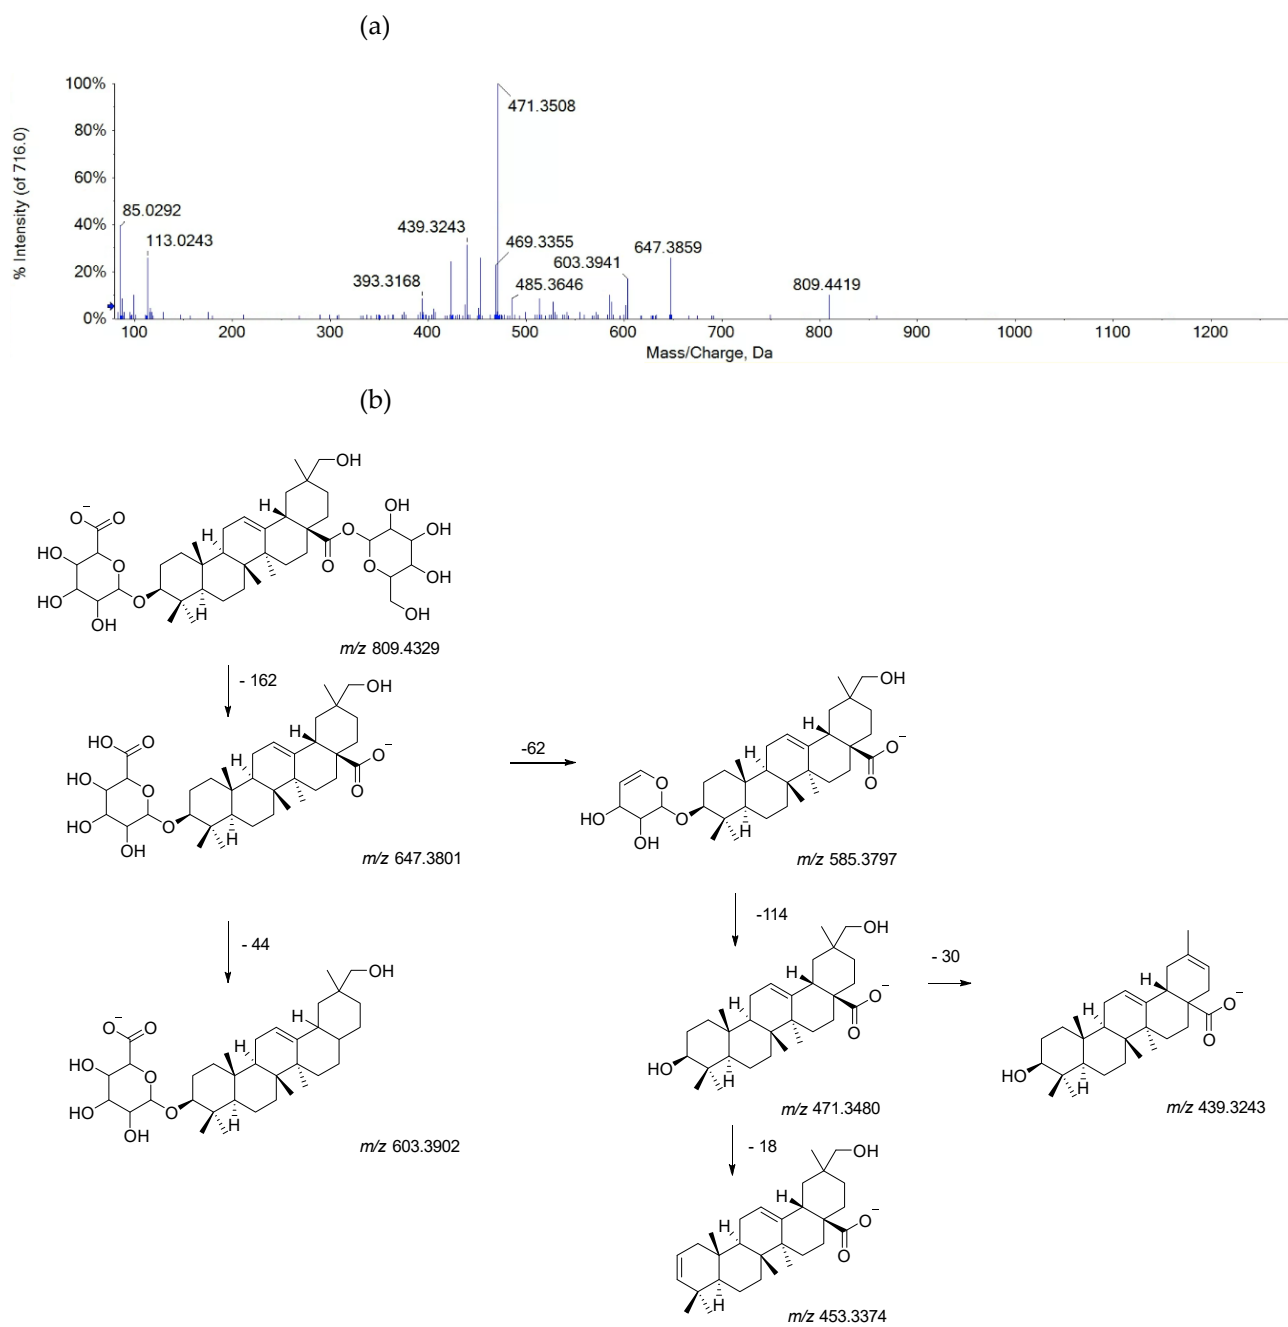



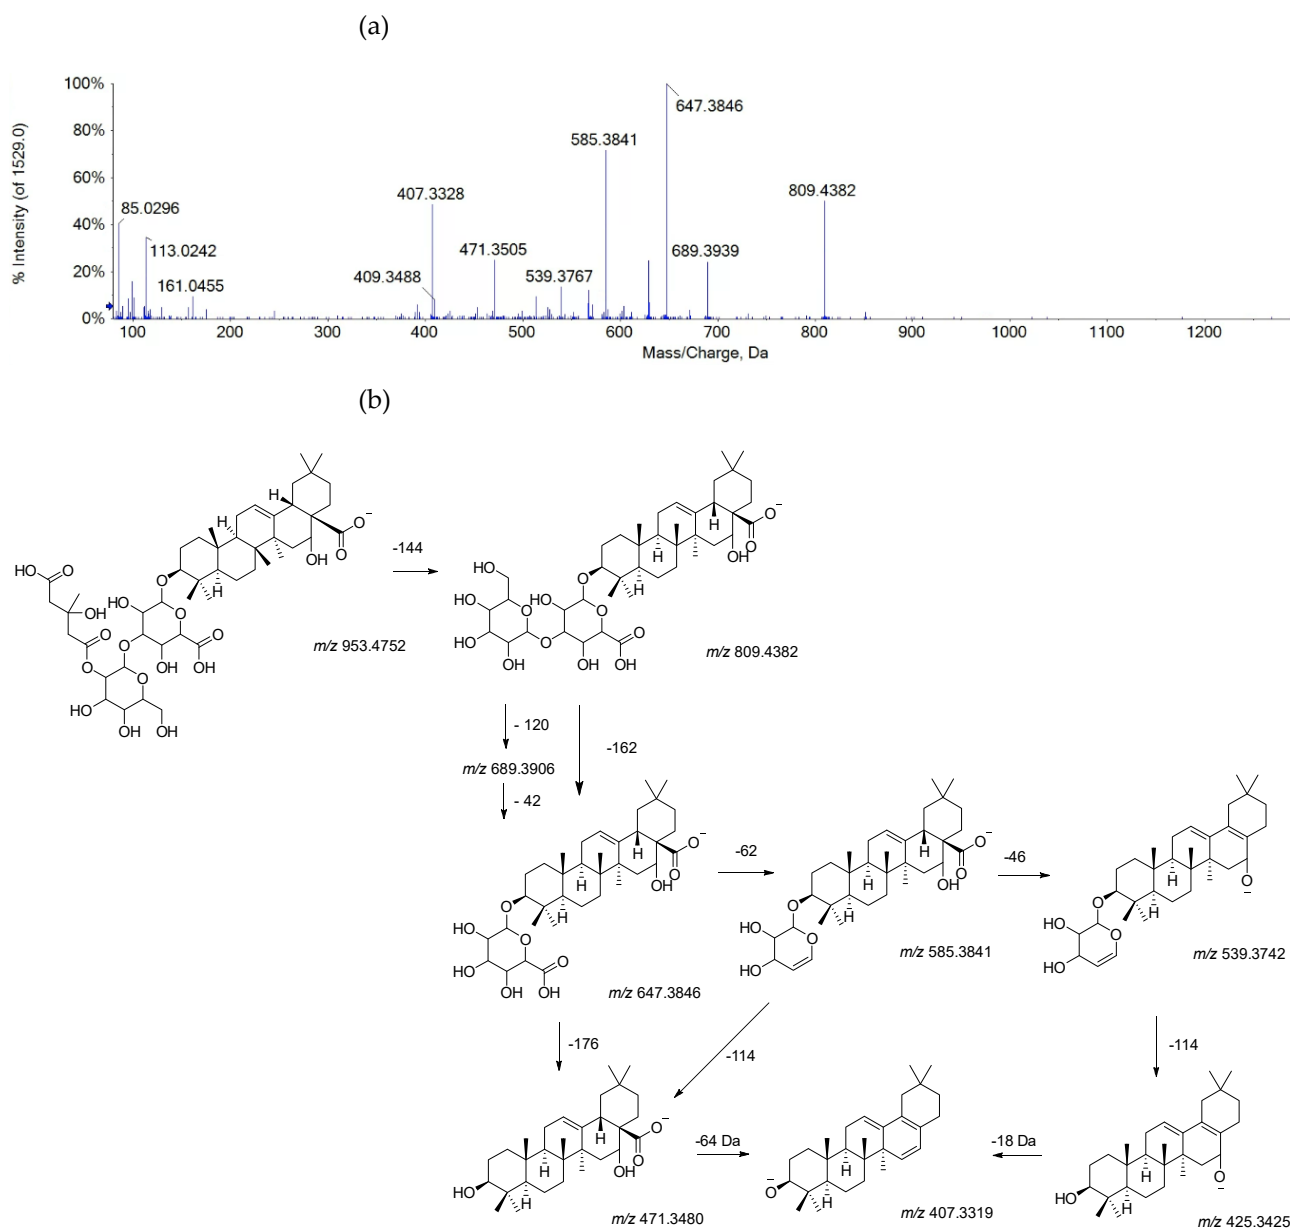

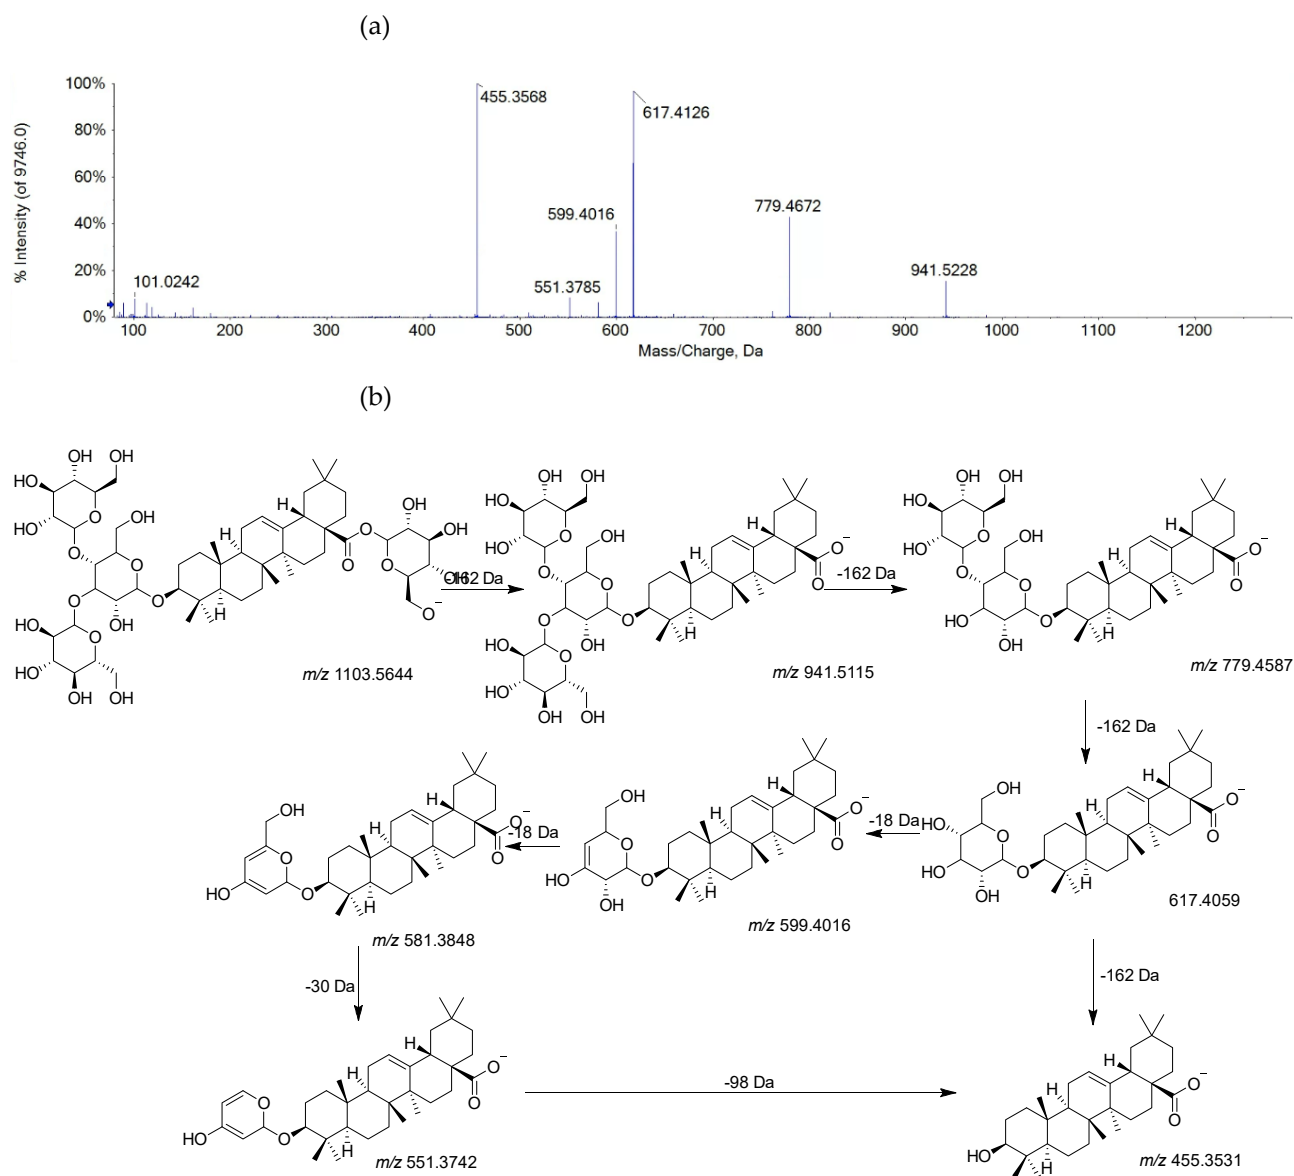

**Figure S10.** (a) TOF-MS/MS spectrum, and (b) tentative fragmentation pathway of the theoretical  $[M-H]^-$  ion for compound **42**.

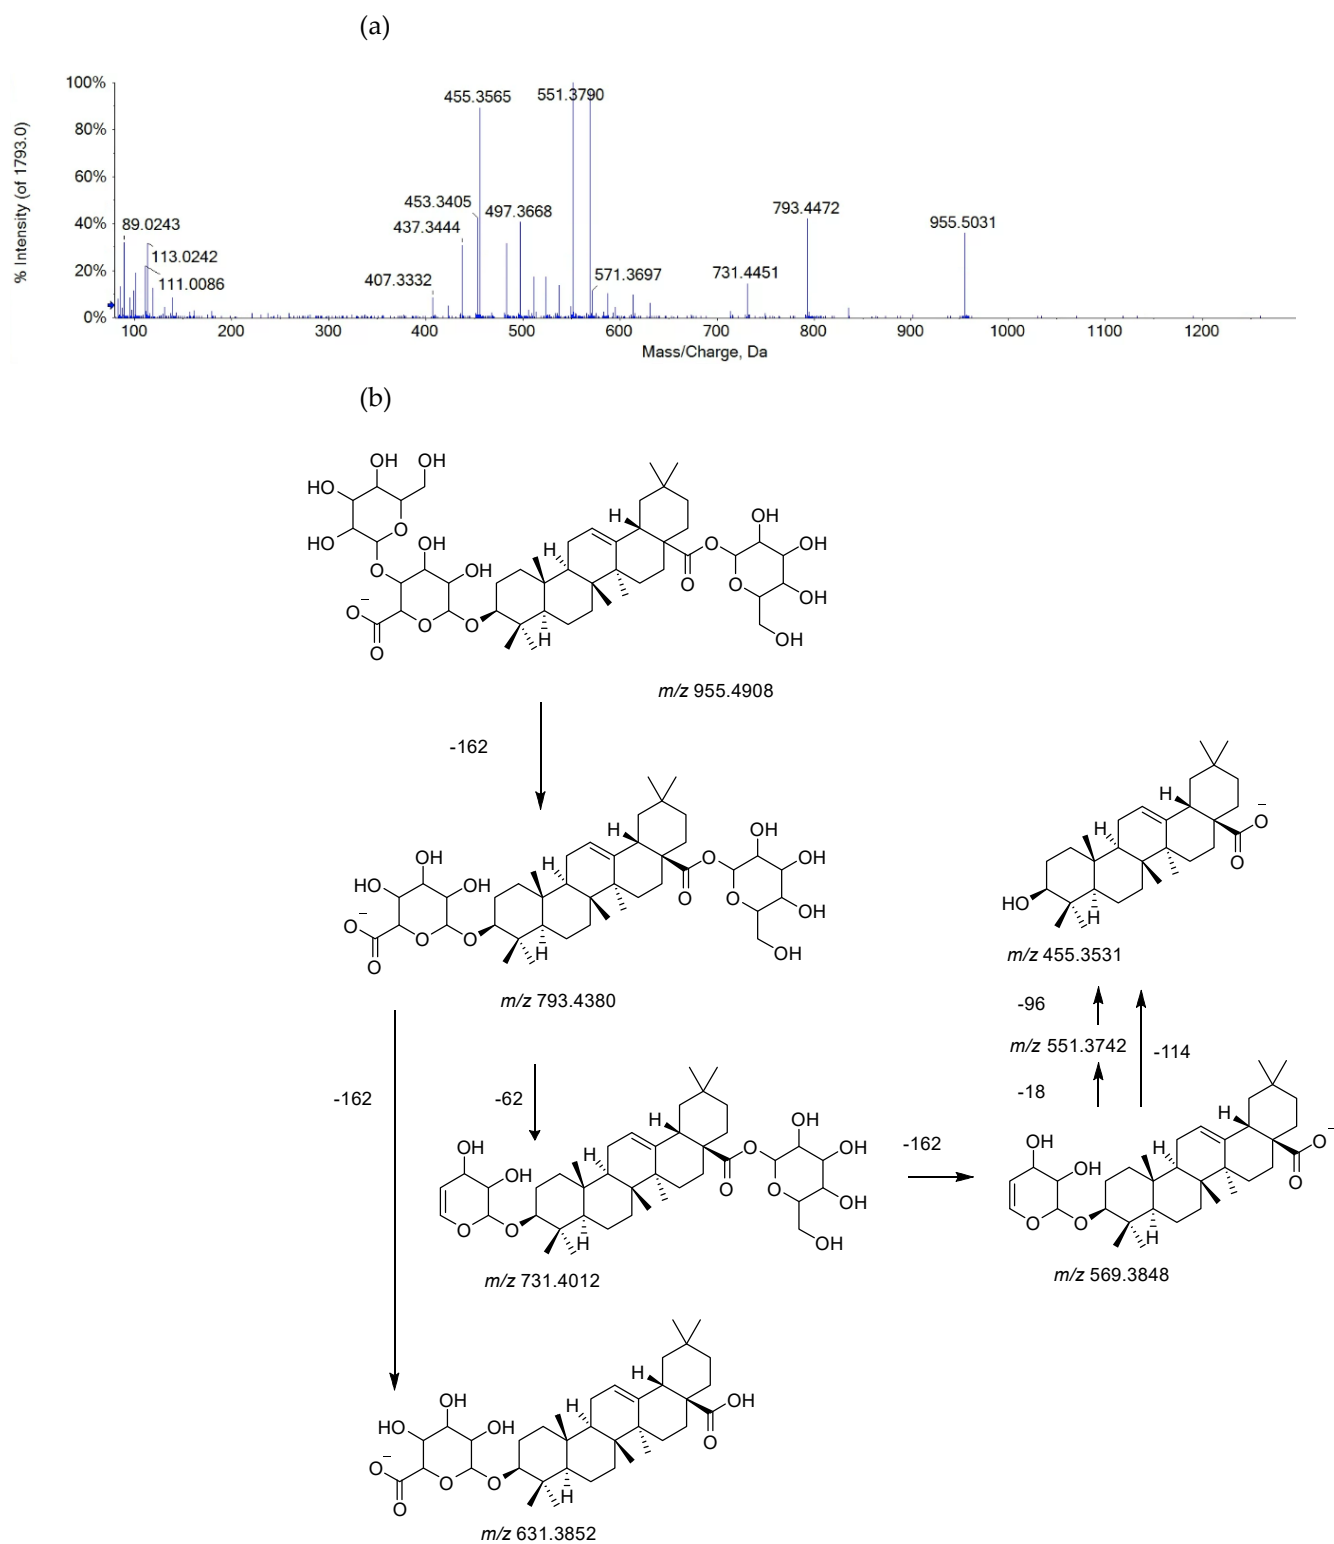

**Figure S11.** (a) TOF-MS/MS spectrum, and (b) tentative fragmentation pathway of the theoretical  $[M-H]^-$  ion for compound **43**.

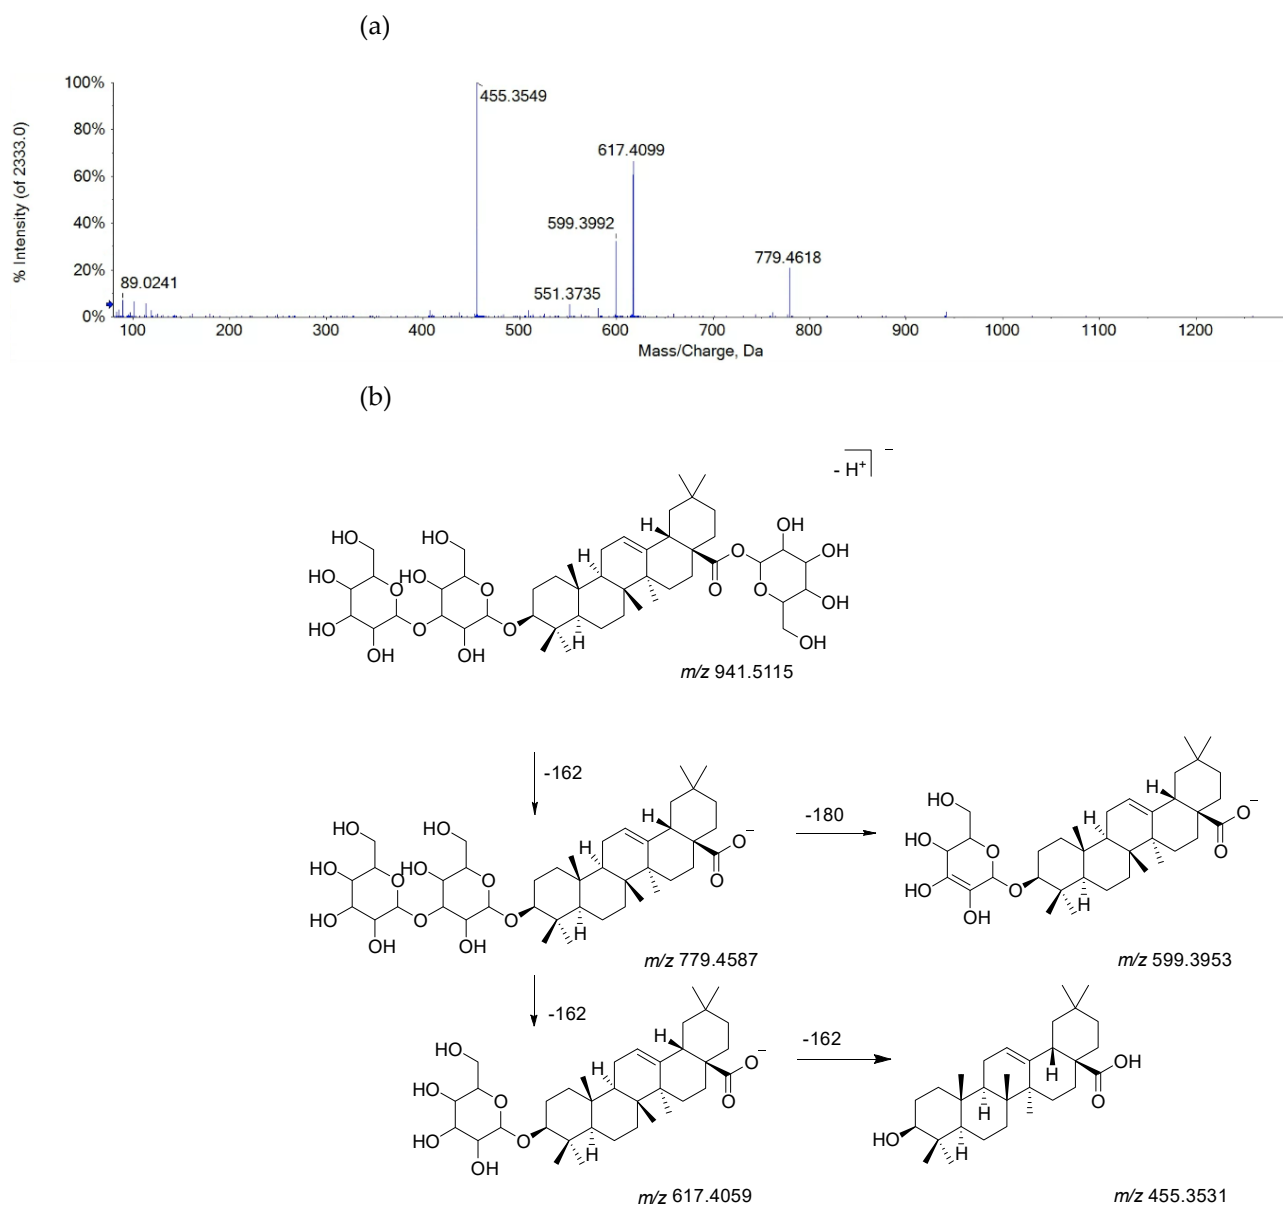

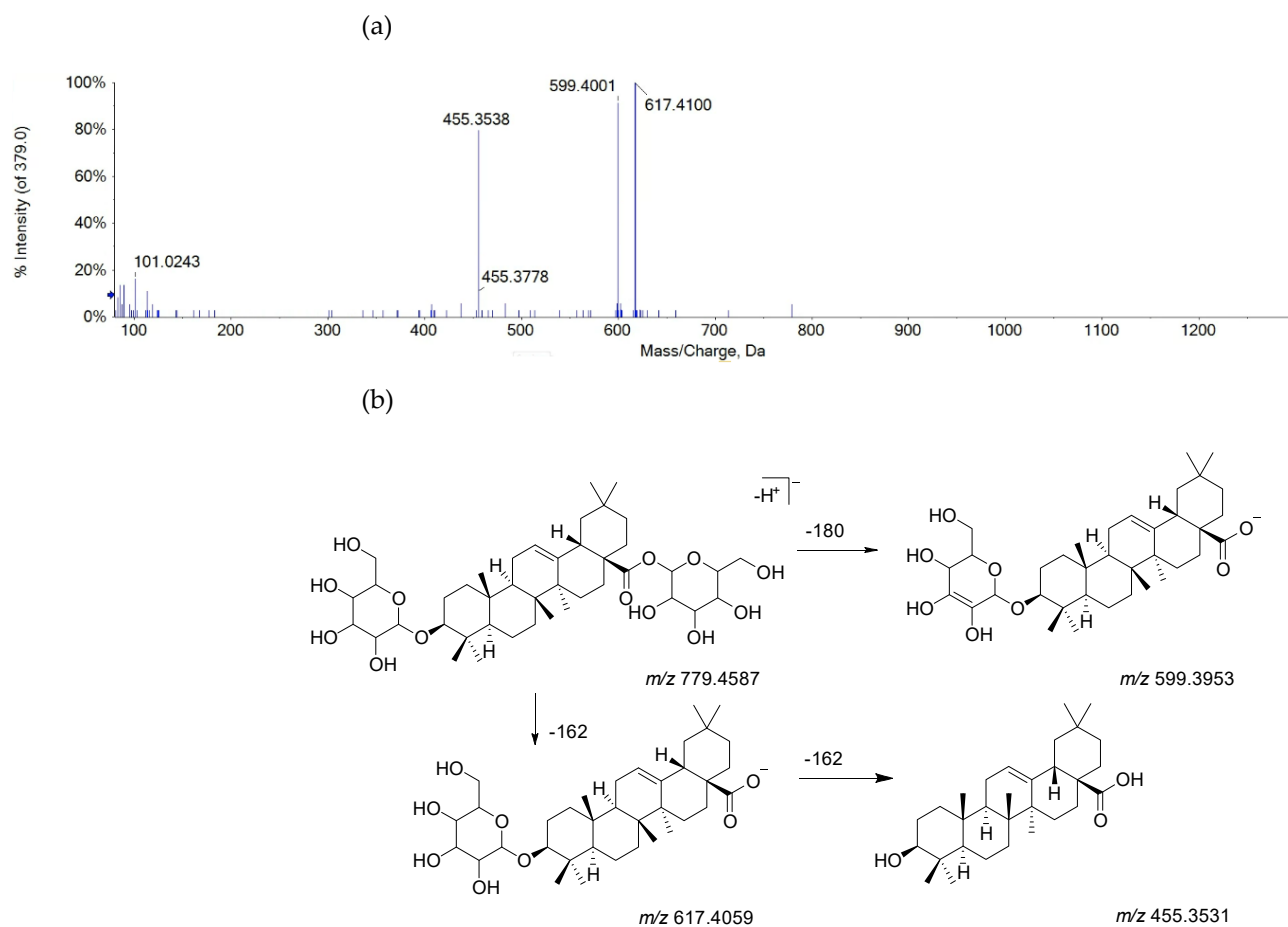

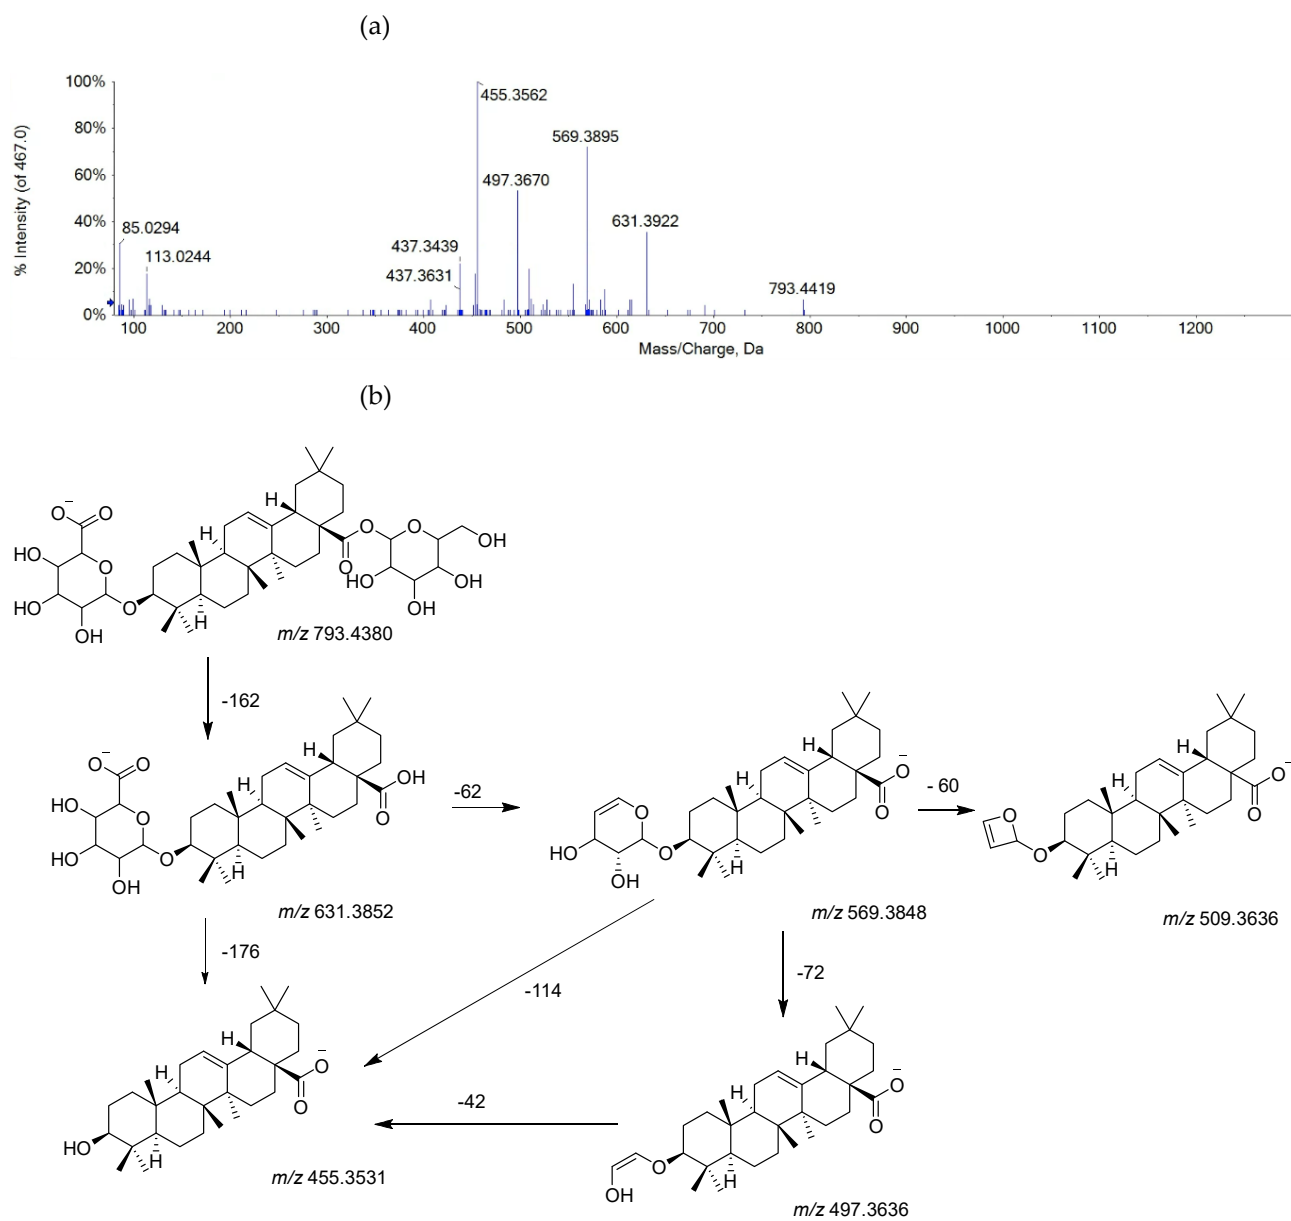

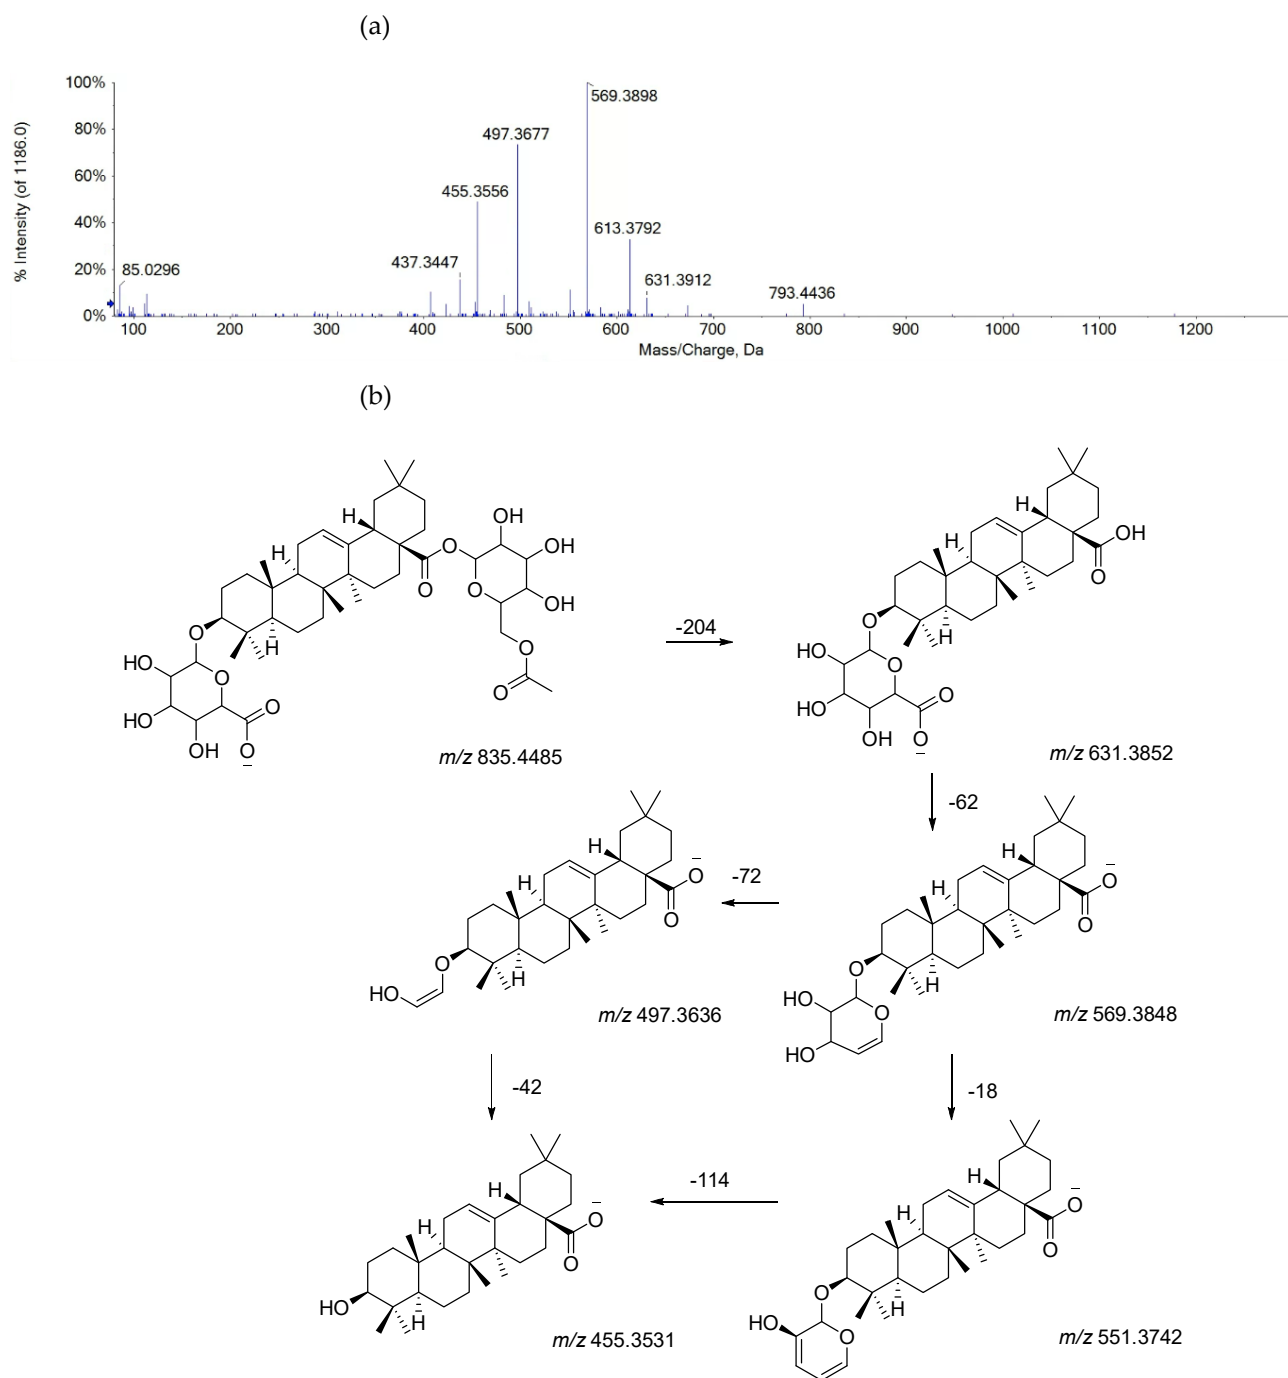

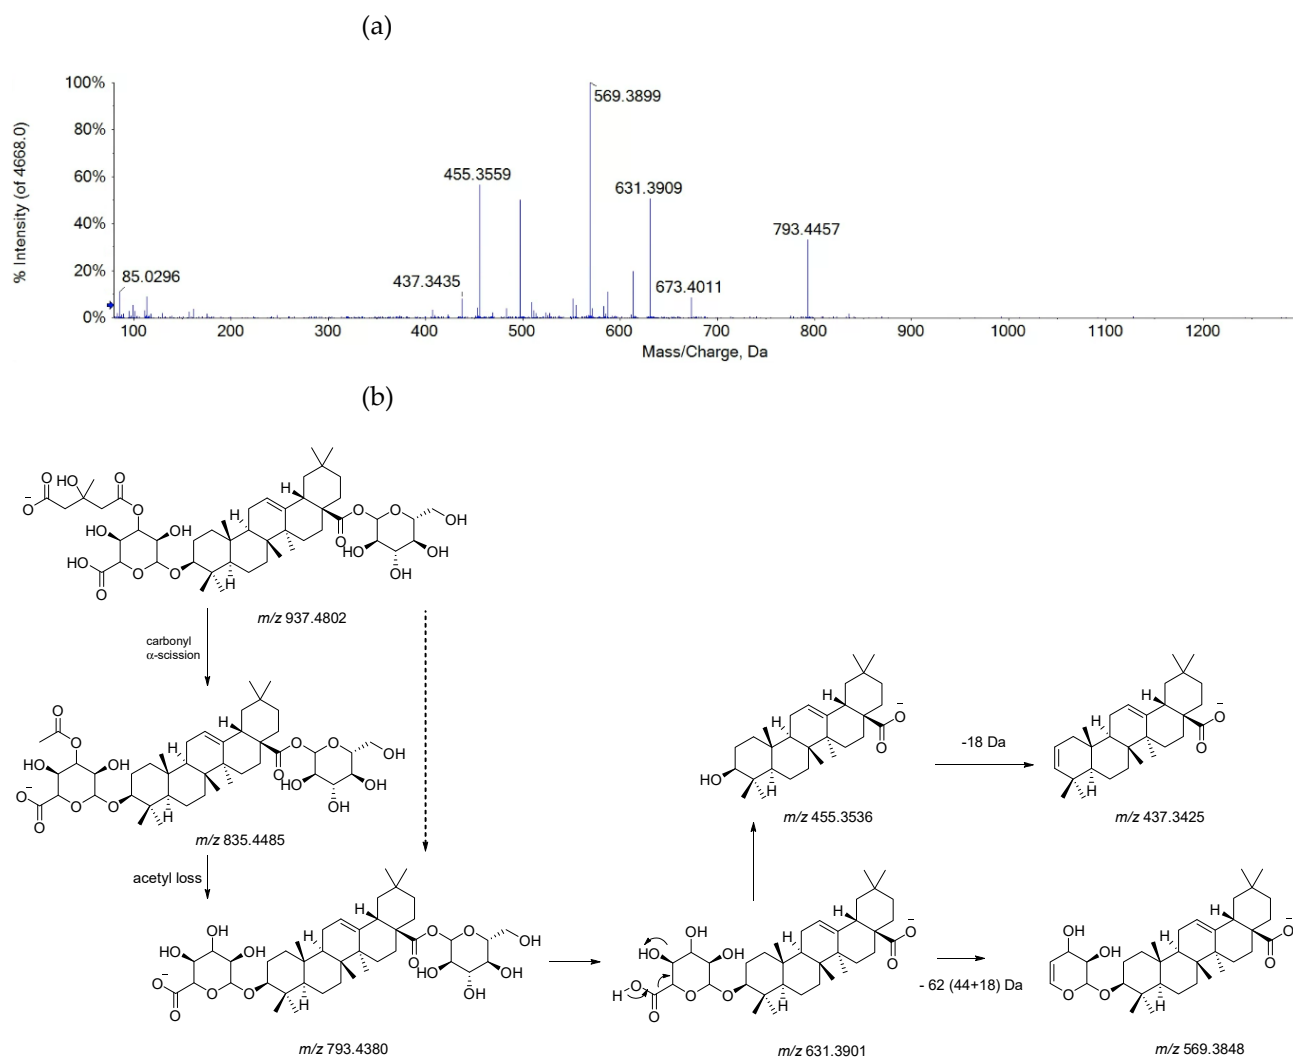



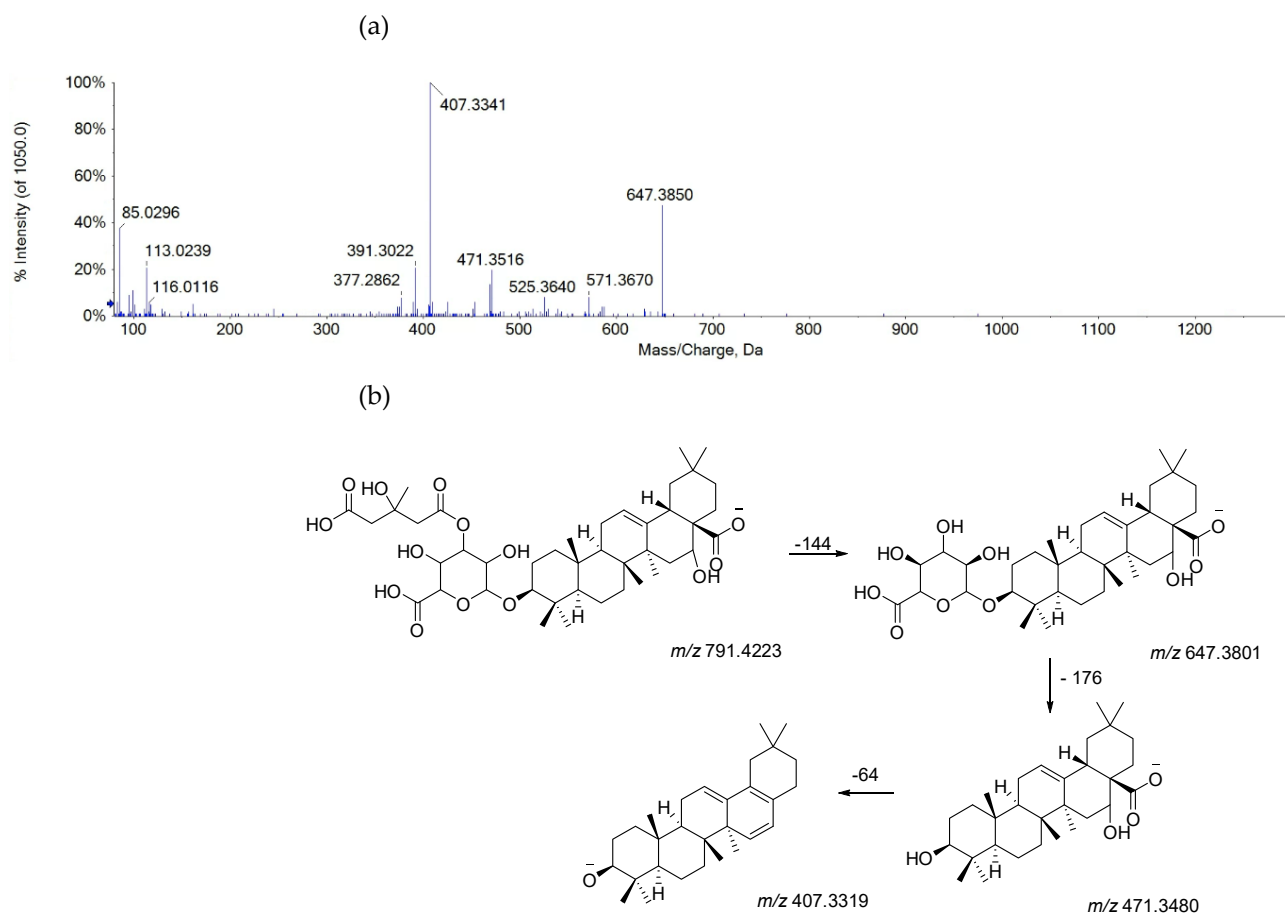

Supplement: s1 [file s1]
